# Supplementary material
Source: publisher figshare collection journal article supplement (https://sage.figshare.com/ndownloader/files/18613901)
Supplement: Supplementary file 1 [file 18613901]

**Article Title:** Effect of propeller induced flow on the performance of biplane micro air vehicle dynamics

**Authors Name:**

| Name               | Affiliation                                                                |
|--------------------|----------------------------------------------------------------------------|
| Shuvrangshu Jana   | Department of Aerospace Engineering,<br>Indian Institute of Science, India |
| Harikumar Kandath  | Department of Aerospace Engineering,<br>Indian Institute of Science, India |
| Mayur Shewale      | Department of Aerospace Engineering,<br>Indian Institute of Science, India |
| M. Seetharama Bhat | Department of Aerospace Engineering,<br>Indian Institute of Science, India |

**Corresponding author:** Shuvrangshu Jana

**Contact Details:**

Shuvrangshu Jana  
GCDSL lab, Room No-148  
Department of Aerospace Engineering  
Indian Institute of Science  
Bengaluru-560012, India  
Mob: 8861551519  
Email: shuvra.ce@gmail.com

**Acknowledgement:**

The authors would like to thank National Aerospace Laboratory ([NAL](#)) for allowing us to conduct wind tunnel test. The authors would also like to thank [Shashank Shivkumar](#), [Susheel Balasubramaniam](#), [Eshaan Khanapuri](#), [Kuntal Ghosh](#) for helping us in conducting wind tunnel test and flow simulation.

**Funding Information:**

The work is funded under National Programme for Micro Air Vehicle (NP-[MICAV](#)) project of Defence Research Development Organization ([DRDO](#)). The authors would like to thank Aeronautics Research and Development Board ([ARDB](#)) for their funding and support for the project.
